# Supplementary material for: TDDFT studies on chiral organophosphonate substituted divacant Keggin-type polyoxotungstate: diplex multistep-redox-triggered chiroptical and NLO switch
Source: Royal Society of Chemistry journal article supplement (doi:10.1039/c2dt30449j), 2012-01-01
Supplement: c2dt30449j.pdf [file c2dt30449j.pdf]

## Supporting information

# **TDDFT Studies on Chiral Organophosphonate Substituted Divacant Keggin-Type Polyoxotungstate: Diplex Multistep-Redox-Triggered Chiroptical and NLO Switch**

Jian-Ping Wang, Guo-Chun Yang, Li-Kai Yan\*, Wei Guan, Shi-Zheng Wen,  
Zhong-Min Su\*

Institute of Functional Material Chemistry, Faculty of Chemistry, Northeast Normal University,

Ren Min Street No.5268, Changchun, Jilin, 130024, P. R. China. Fax: +86-431-85684009; Tel:

+86-431-85099108; E-mail: [zmsu@nenu.edu.cn](mailto:zmsu@nenu.edu.cn), [yanlk924@nenu.edu.cn](mailto:yanlk924@nenu.edu.cn)

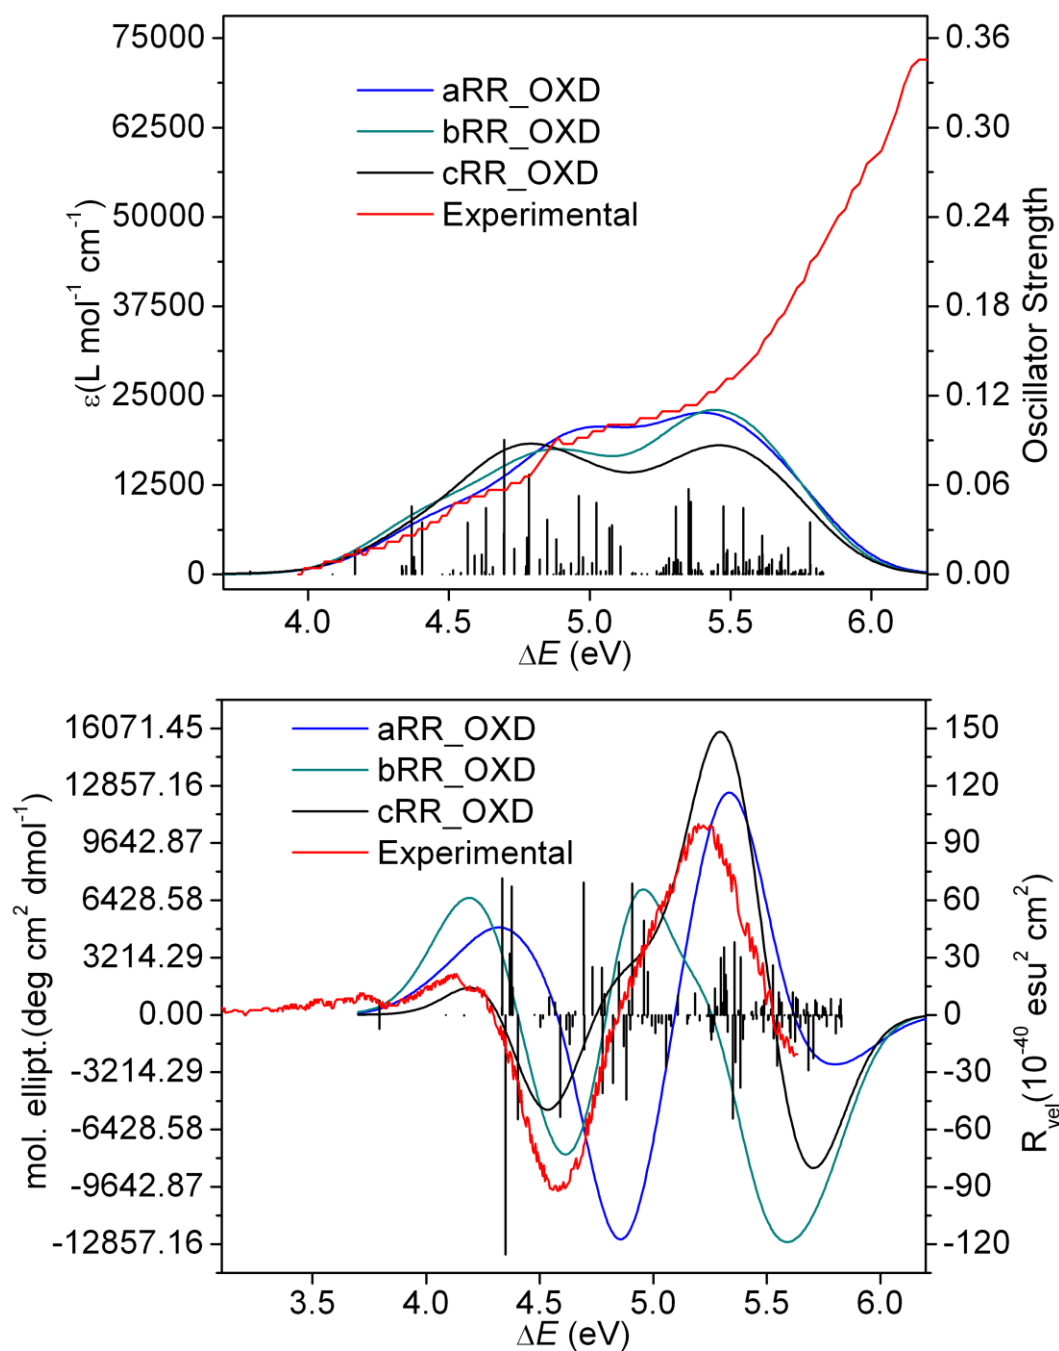

Figure S1 The UV-Vis and ECD spectra of three conformations for OXD. The simulated spectra are shifted by +0.2 eV.

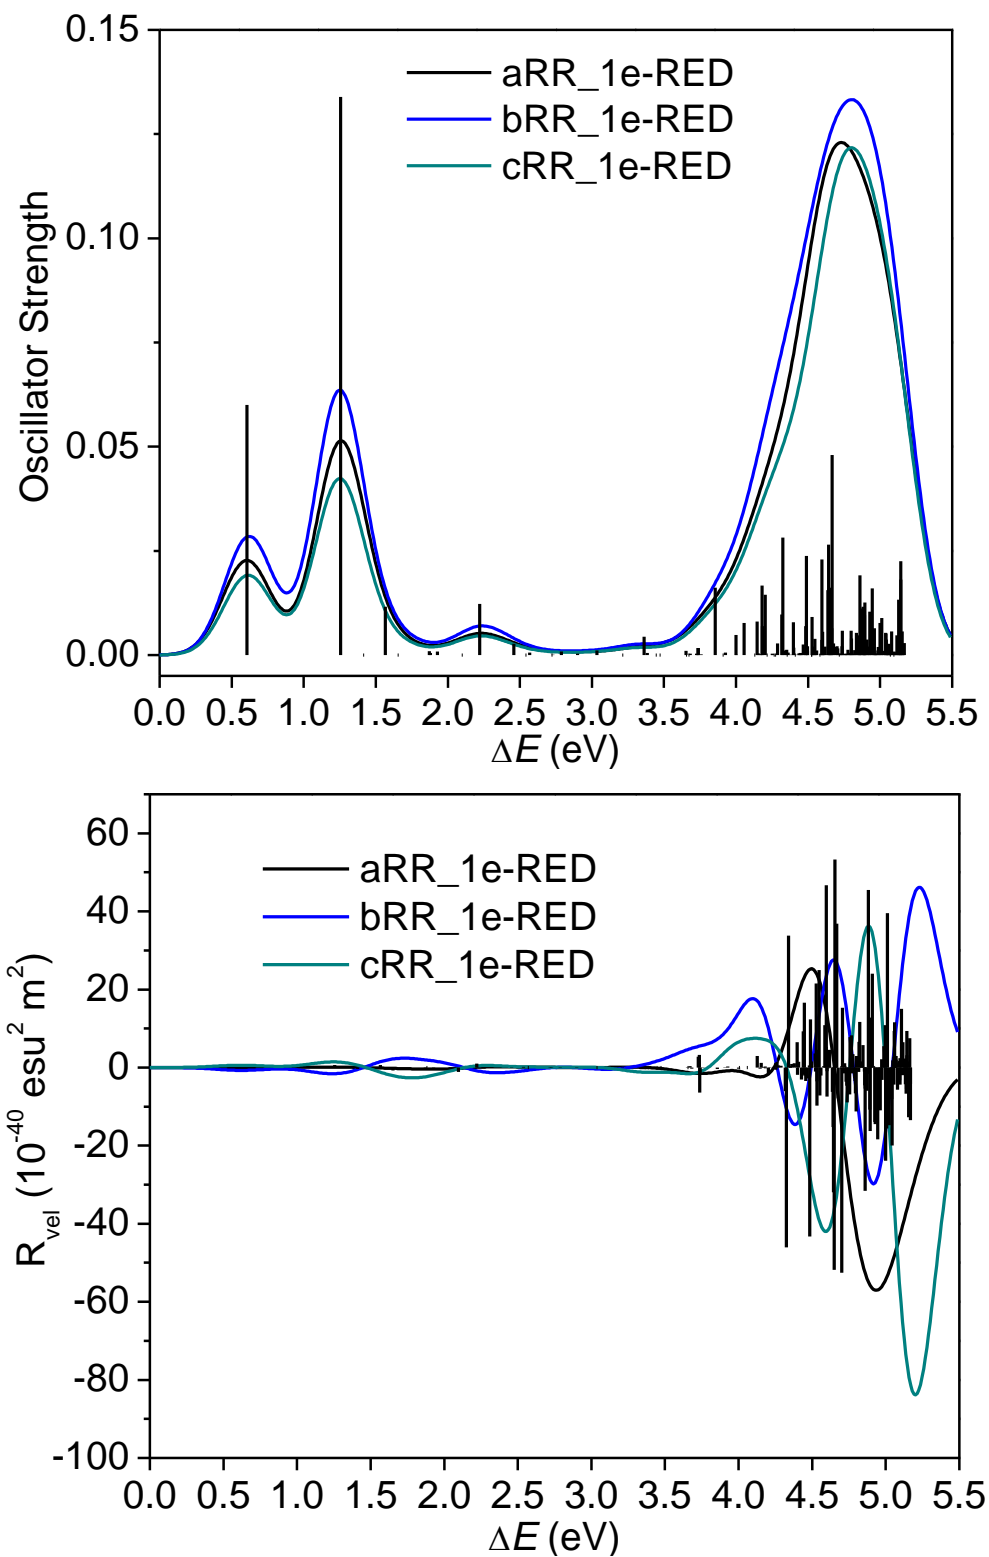

Figure S2 The UV-Vis and ECD spectra of three conformations for 1e-RED.

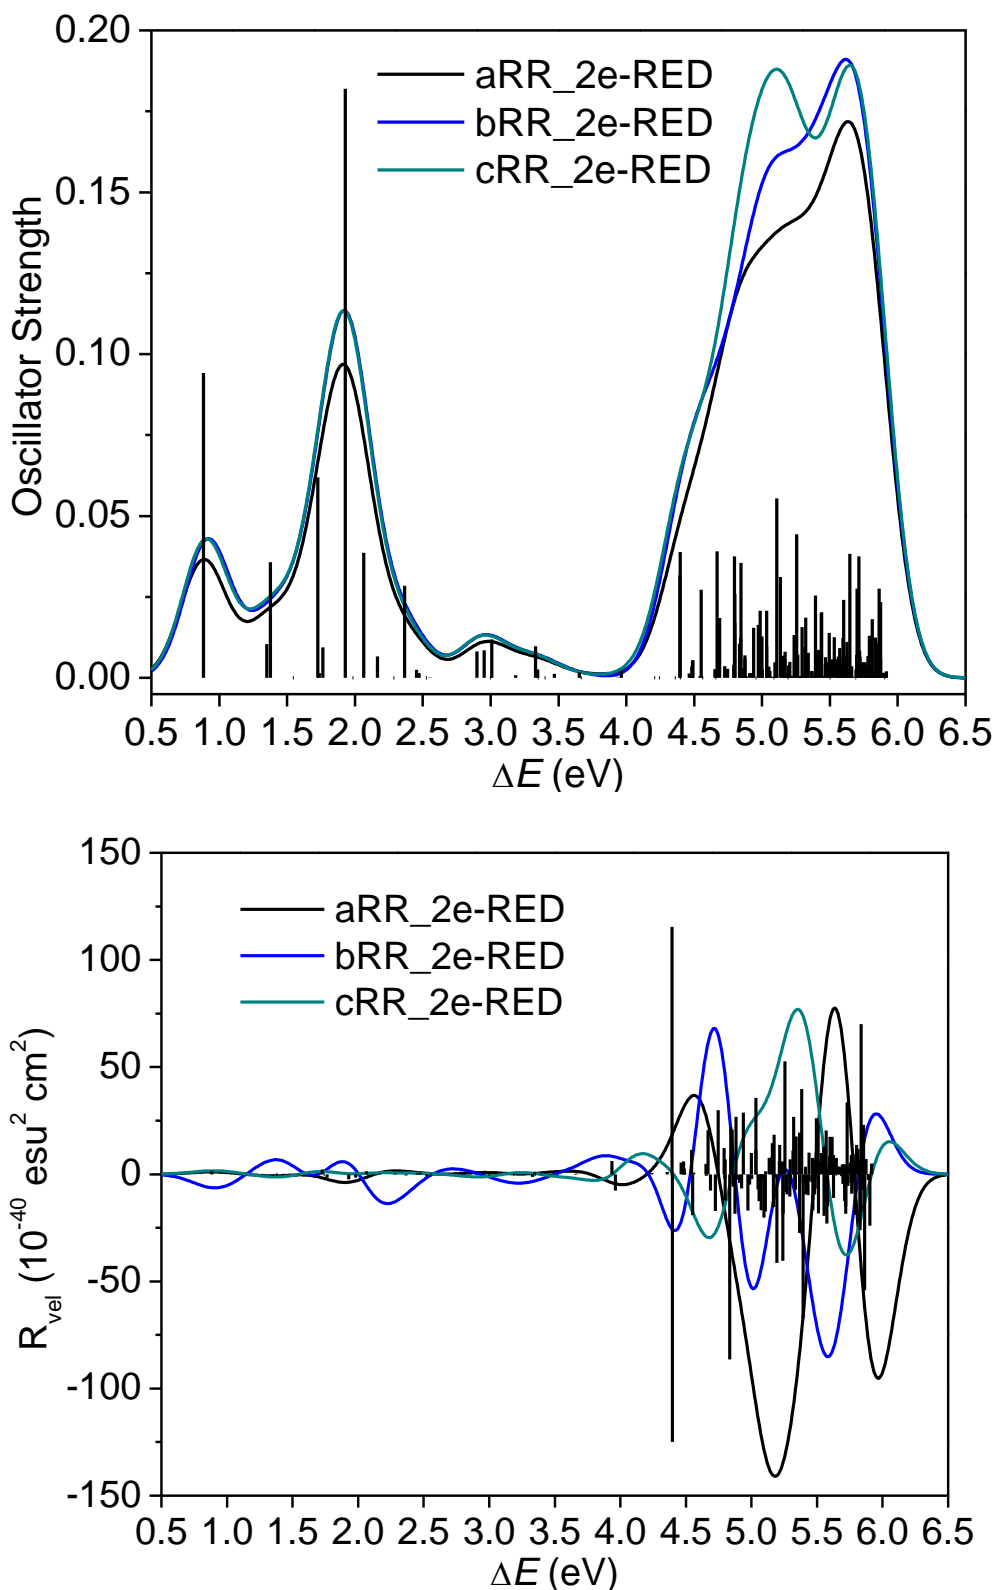

Figure S3 The UV-Vis and ECD spectra of three conformations for 2e-RED.

Table S1 The selected excited states for OXD.

| excitation | symmetry | $\Delta E$ (eV) | $f$ | MO | coefficient | EDDM |
|------------|----------|-----------------|-----|----|-------------|------|
|------------|----------|-----------------|-----|----|-------------|------|

|           |          |      |       |           |          |                                                                                       |
|-----------|----------|------|-------|-----------|----------|---------------------------------------------------------------------------------------|
| 6(cRR)    | A        | 4.14 | 0.004 | 244 → 272 | 0.11502  | 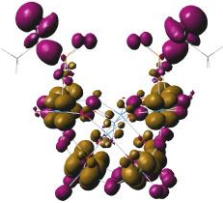   |
|           |          |      |       | 258 → 272 | 0.26981  |                                                                                       |
|           |          |      |       | 262 → 272 | -0.10155 |                                                                                       |
|           |          |      |       | 263 → 273 | -0.17871 |                                                                                       |
|           |          |      |       | 264 → 276 | -0.12732 |                                                                                       |
|           |          |      |       | 265 → 273 | -0.20159 |                                                                                       |
|           |          |      |       | 270 → 272 | 0.37233  |                                                                                       |
|           |          |      |       | 271 → 273 | -0.22234 |                                                                                       |
| 7(cRR)    | A        | 4.15 | 0.006 | 258 → 272 | 0.37573  |    |
|           |          |      |       | 261 → 272 | 0.16676  |                                                                                       |
|           |          |      |       | 262 → 272 | 0.11402  |                                                                                       |
|           |          |      |       | 263 → 273 | 0.17130  |                                                                                       |
|           |          |      |       | 264 → 276 | -0.15407 |                                                                                       |
|           |          |      |       | 265 → 273 | -0.23258 |                                                                                       |
|           |          |      |       | 270 → 272 | -0.21772 |                                                                                       |
|           |          |      |       | 271 → 273 | 0.12653  |                                                                                       |
| 10(bRR)   | A        | 4.17 | 0.024 | 257 → 272 | -0.19462 |   |
|           |          |      |       | 259 → 272 | 0.17115  |                                                                                       |
|           |          |      |       | 259 → 276 | -0.10166 |                                                                                       |
|           |          |      |       | 262 → 273 | -0.24446 |                                                                                       |
|           |          |      |       | 263 → 272 | 0.29046  |                                                                                       |
|           |          |      |       | 266 → 272 | 0.13032  |                                                                                       |
|           |          |      |       | 267 → 273 | 0.18421  |                                                                                       |
|           |          |      |       | 268 → 273 | 0.11782  |                                                                                       |
|           |          |      |       | 269 → 272 | 0.21482  |                                                                                       |
| 11(cRR)   | B        | 4.20 | 0.035 | 253 → 272 | 0.13724  |  |
|           |          |      |       | 253 → 276 | 0.10941  |                                                                                       |
|           |          |      |       | 256 → 272 | 0.18511  |                                                                                       |
|           |          |      |       | 257 → 272 | 0.13952  |                                                                                       |
|           |          |      |       | 259 → 273 | 0.21894  |                                                                                       |
|           |          |      |       | 260 → 273 | 0.14265  |                                                                                       |
|           |          |      |       | 262 → 273 | 0.23208  |                                                                                       |
|           |          |      |       | 263 → 272 | -0.14600 |                                                                                       |
|           |          |      |       | 264 → 277 | -0.10385 |                                                                                       |
|           |          |      |       | 265 → 275 | -0.10444 |                                                                                       |
|           |          |      |       | 267 → 272 | 0.10243  |                                                                                       |
|           |          |      |       | 268 → 273 | 0.18661  |                                                                                       |
| 271 → 275 | -0.13401 |      |       |           |          |                                                                                       |
| 18(cRR)   | B        | 4.39 | 0.013 | 255 → 275 | -0.14599 |  |
|           |          |      |       | 256 → 272 | 0.21591  |                                                                                       |
|           |          |      |       | 259 → 273 | 0.11913  |                                                                                       |
|           |          |      |       | 260 → 273 | -0.26649 |                                                                                       |
|           |          |      |       | 262 → 274 | -0.12309 |                                                                                       |
|           |          |      |       | 270 → 277 | 0.14735  |                                                                                       |

|           |          |      |       |           |          |                                                                                       |
|-----------|----------|------|-------|-----------|----------|---------------------------------------------------------------------------------------|
|           |          |      |       | 271 → 275 | 0.31589  |                                                                                       |
| 30(bRR)   | B        | 4.58 | 0.015 | 246 → 272 | 0.31585  | 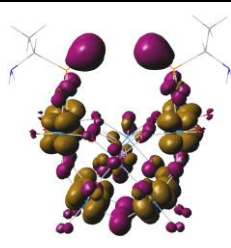   |
|           |          |      |       | 250 → 272 | 0.13958  |                                                                                       |
|           |          |      |       | 263 → 273 | -0.13643 |                                                                                       |
|           |          |      |       | 268 → 272 | 0.16343  |                                                                                       |
|           |          |      |       | 268 → 276 | -0.17288 |                                                                                       |
|           |          |      |       | 269 → 273 | 0.31880  |                                                                                       |
| 31(bRR)   | B        | 4.58 | 0.063 | 246 → 272 | -0.15706 |    |
|           |          |      |       | 247 → 272 | 0.20699  |                                                                                       |
|           |          |      |       | 253 → 275 | 0.11226  |                                                                                       |
|           |          |      |       | 254 → 273 | 0.10812  |                                                                                       |
|           |          |      |       | 256 → 272 | -0.18391 |                                                                                       |
|           |          |      |       | 262 → 272 | -0.13286 |                                                                                       |
|           |          |      |       | 264 → 273 | 0.12379  |                                                                                       |
|           |          |      |       | 264 → 274 | 0.17820  |                                                                                       |
|           |          |      |       | 265 → 276 | -0.19609 |                                                                                       |
| 269 → 273 | -0.14473 |      |       |           |          |                                                                                       |
| 44(bRR)   | B        | 4.76 | 0.022 | 240 → 273 | -0.14450 |   |
|           |          |      |       | 241 → 272 | 0.16887  |                                                                                       |
|           |          |      |       | 244 → 272 | -0.15880 |                                                                                       |
|           |          |      |       | 249 → 275 | -0.11406 |                                                                                       |
|           |          |      |       | 250 → 275 | -0.17512 |                                                                                       |
|           |          |      |       | 254 → 274 | 0.14168  |                                                                                       |
|           |          |      |       | 270 → 277 | -0.17110 |                                                                                       |
|           |          |      |       | 270 → 280 | -0.16278 |                                                                                       |
|           |          |      |       | 271 → 275 | 0.18707  |                                                                                       |
|           |          |      |       | 271 → 279 | 0.21847  |                                                                                       |
|           |          |      |       | 271 → 284 | 0.14835  |                                                                                       |
| 45(bRR)   | B        | 4.76 | 0.038 | 243 → 272 | 0.10204  |  |
|           |          |      |       | 244 → 275 | 0.12852  |                                                                                       |
|           |          |      |       | 246 → 272 | 0.18846  |                                                                                       |
|           |          |      |       | 250 → 272 | -0.17964 |                                                                                       |
|           |          |      |       | 260 → 274 | -0.11043 |                                                                                       |
|           |          |      |       | 263 → 273 | 0.10233  |                                                                                       |
|           |          |      |       | 270 → 277 | -0.12496 |                                                                                       |
|           |          |      |       | 270 → 280 | -0.13628 |                                                                                       |
|           |          |      |       | 271 → 275 | 0.14501  |                                                                                       |
|           |          |      |       | 271 → 279 | 0.16694  |                                                                                       |
|           |          |      |       | 271 → 284 | 0.13022  |                                                                                       |
| 71(bRR)   | A        | 5.10 | 0.012 | 235 → 272 | 0.10759  |  |
|           |          |      |       | 248 → 274 | 0.12099  |                                                                                       |
|           |          |      |       | 255 → 274 | -0.12495 |                                                                                       |
|           |          |      |       | 263 → 272 | -0.11957 |                                                                                       |
|           |          |      |       | 266 → 272 | -0.11818 |                                                                                       |

|          |   |      |       |           |          |                                                                                      |
|----------|---|------|-------|-----------|----------|--------------------------------------------------------------------------------------|
|          |   |      |       | 268 → 273 | -0.11888 |                                                                                      |
|          |   |      |       | 268 → 277 | 0.10033  |                                                                                      |
|          |   |      |       | 269 → 272 | 0.14714  |                                                                                      |
|          |   |      |       | 269 → 275 | 0.18886  |                                                                                      |
|          |   |      |       | 270 → 282 | 0.12230  |                                                                                      |
|          |   |      |       | 271 → 287 | -0.10686 |                                                                                      |
| 78(cRR)  | B | 5.16 | 0.049 | 231 → 275 | -0.11647 | 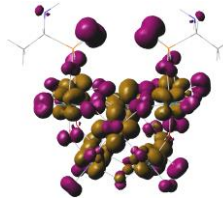  |
|          |   |      |       | 246 → 275 | 0.10533  |                                                                                      |
|          |   |      |       | 255 → 275 | 0.11659  |                                                                                      |
|          |   |      |       | 256 → 275 | -0.12430 |                                                                                      |
|          |   |      |       | 258 → 274 | -0.10344 |                                                                                      |
|          |   |      |       | 259 → 274 | -0.11423 |                                                                                      |
|          |   |      |       | 260 → 274 | 0.13232  |                                                                                      |
|          |   |      |       | 266 → 273 | -0.13063 |                                                                                      |
|          |   |      |       | 267 → 272 | -0.13045 |                                                                                      |
| 126(cRR) | B | 5.51 | 0.018 | 248 → 275 | -0.10366 |  |
|          |   |      |       | 258 → 280 | -0.18715 |                                                                                      |
|          |   |      |       | 264 → 277 | 0.18842  |                                                                                      |
|          |   |      |       | 270 → 277 | 0.12750  |                                                                                      |
|          |   |      |       | 271 → 279 | 0.18571  |                                                                                      |

Table S2 The selected excited states of aRR conformation for 1e-RED.

| excitation  | $\Delta E(\text{eV})$ | $f$   | MO          | coefficient | EDDM                                                                                  |
|-------------|-----------------------|-------|-------------|-------------|---------------------------------------------------------------------------------------|
| 54          | 4.32                  | 0.028 | 249A → 275A | -0.12732    | 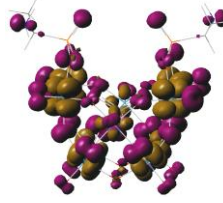 |
|             |                       |       | 257A → 273A | 0.13849     |                                                                                       |
|             |                       |       | 258A → 275A | -0.18034    |                                                                                       |
|             |                       |       | 261A → 273A | -0.21202    |                                                                                       |
|             |                       |       | 262A → 273A | 0.26482     |                                                                                       |
|             |                       |       | 262A → 274A | 0.11109     |                                                                                       |
|             |                       |       | 264A → 276A | -0.12777    |                                                                                       |
|             |                       |       | 265A → 277A | -0.11304    |                                                                                       |
|             |                       |       | 270A → 276A | 0.10883     |                                                                                       |
|             |                       |       | 271A → 277A | 0.11051     |                                                                                       |
|             |                       |       | 271A → 278A | 0.10469     |                                                                                       |
|             |                       |       | 242B → 273B | -0.11752    |                                                                                       |
|             |                       |       | 246B → 272B | 0.12182     |                                                                                       |
|             |                       |       | 249B → 272B | -0.11403    |                                                                                       |
|             |                       |       | 256B → 272B | -0.13945    |                                                                                       |
|             |                       |       | 257B → 272B | 0.12710     |                                                                                       |
|             |                       |       | 257B → 275B | -0.11153    |                                                                                       |
|             |                       |       | 258B → 273B | 0.13200     |                                                                                       |
|             |                       |       | 259B → 272B | -0.22036    |                                                                                       |
|             |                       |       | 259B → 276B | -0.10764    |                                                                                       |
| 261B → 273B | 0.25754               |       |             |             |                                                                                       |

|    |      |       |             |          |                                                                                       |
|----|------|-------|-------------|----------|---------------------------------------------------------------------------------------|
|    |      |       | 262B → 277B | 0.13407  |                                                                                       |
|    |      |       | 264B → 273B | 0.23695  |                                                                                       |
|    |      |       | 264B → 274B | -0.11512 |                                                                                       |
|    |      |       | 266B → 278B | 0.13598  |                                                                                       |
|    |      |       | 269B → 273B | -0.11812 |                                                                                       |
| 55 | 4.34 | 0.001 | 257A → 273A | -0.21348 | 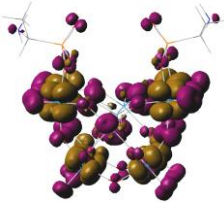   |
|    |      |       | 259A → 273A | -0.14829 |                                                                                       |
|    |      |       | 261A → 273A | -0.14067 |                                                                                       |
|    |      |       | 263A → 275A | 0.25164  |                                                                                       |
|    |      |       | 264A → 273A | 0.10224  |                                                                                       |
|    |      |       | 266A → 273A | 0.10446  |                                                                                       |
|    |      |       | 241B → 273B | -0.11941 |                                                                                       |
|    |      |       | 245B → 273B | -0.13658 |                                                                                       |
|    |      |       | 248B → 273B | 0.11634  |                                                                                       |
|    |      |       | 250B → 272B | -0.13595 |                                                                                       |
|    |      |       | 251B → 275B | -0.10053 |                                                                                       |
|    |      |       | 254B → 273B | 0.21764  |                                                                                       |
|    |      |       | 257B → 272B | 0.34289  |                                                                                       |
|    |      |       | 258B → 273B | -0.22922 |                                                                                       |
|    |      |       | 259B → 272B | 0.16336  |                                                                                       |
|    |      |       | 262B → 273B | -0.23521 |                                                                                       |
|    |      |       | 263B → 272B | 0.19468  |                                                                                       |
|    |      |       | 263B → 276B | 0.13667  |                                                                                       |
|    |      |       | 266B → 276B | -0.14854 |                                                                                       |
| 71 | 4.48 | 0.007 | 251A → 273A | -0.12067 |  |
|    |      |       | 253A → 273A | -0.15188 |                                                                                       |
|    |      |       | 260A → 275A | 0.12922  |                                                                                       |
|    |      |       | 265A → 274A | 0.11058  |                                                                                       |
|    |      |       | 251B → 273B | -0.11980 |                                                                                       |
|    |      |       | 254B → 272B | -0.11116 |                                                                                       |
|    |      |       | 257B → 273B | -0.12548 |                                                                                       |
|    |      |       | 260B → 272B | -0.14931 |                                                                                       |
|    |      |       | 267B → 273B | -0.10056 |                                                                                       |
|    |      |       | 268B → 273B | 0.16314  |                                                                                       |
|    |      |       | 270B → 272B | 0.41763  |                                                                                       |
|    |      |       | 270B → 273B | -0.11314 |                                                                                       |
|    |      |       | 271B → 273B | -0.32694 |                                                                                       |
|    |      |       | 271B → 274B | -0.13982 |                                                                                       |
| 87 | 4.60 | 0.023 | 245A → 273A | 0.10326  |  |
|    |      |       | 253A → 275A | 0.10449  |                                                                                       |
|    |      |       | 270A → 273A | -0.11898 |                                                                                       |
|    |      |       | 270A → 274A | 0.23217  |                                                                                       |
|    |      |       | 271A → 275A | 0.18934  |                                                                                       |
|    |      |       | 238B → 273B | 0.11671  |                                                                                       |



|    |      |       |             |          |                                                                                       |
|----|------|-------|-------------|----------|---------------------------------------------------------------------------------------|
|    |      |       | 239B → 272B | -0.12875 |                                                                                       |
|    |      |       | 250B → 272B | -0.16682 |                                                                                       |
|    |      |       | 254B → 273B | 0.14018  |                                                                                       |
|    |      |       | 256B → 275B | -0.16532 |                                                                                       |
|    |      |       | 262B → 273B | 0.17213  |                                                                                       |
|    |      |       | 262B → 274B | 0.14976  |                                                                                       |
|    |      |       | 265B → 273B | -0.12340 |                                                                                       |
|    |      |       | 266B → 272B | -0.12363 |                                                                                       |
|    |      |       | 266B → 276B | 0.17781  |                                                                                       |
|    |      |       | 267B → 276B | 0.15777  |                                                                                       |
| 96 | 4.65 | 0.016 | 238A → 273A | -0.12571 | 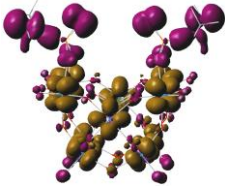   |
|    |      |       | 239A → 275A | 0.10957  |                                                                                       |
|    |      |       | 247A → 273A | 0.15072  |                                                                                       |
|    |      |       | 259A → 273A | -0.11133 |                                                                                       |
|    |      |       | 266A → 273A | 0.23689  |                                                                                       |
|    |      |       | 267A → 275A | -0.14640 |                                                                                       |
|    |      |       | 270A → 276A | 0.14764  |                                                                                       |
|    |      |       | 271A → 275A | -0.14166 |                                                                                       |
|    |      |       | 271A → 277A | 0.11807  |                                                                                       |
|    |      |       | 271A → 278A | 0.12051  |                                                                                       |
|    |      |       | 239B → 272B | -0.12622 |                                                                                       |
|    |      |       | 247B → 272B | 0.14138  |                                                                                       |
|    |      |       | 250B → 272B | -0.13931 |                                                                                       |
|    |      |       | 254B → 273B | -0.10999 |                                                                                       |
|    |      |       | 255B → 274B | -0.15379 |                                                                                       |
|    |      |       | 256B → 275B | 0.16289  |                                                                                       |
|    |      |       | 261B → 277B | 0.11055  |                                                                                       |
|    |      |       | 262B → 274B | -0.14676 |                                                                                       |
|    |      |       | 270B → 277B | 0.18447  |                                                                                       |
|    |      |       | 271B → 275B | 0.25170  |                                                                                       |
|    |      |       | 271B → 278B | 0.12887  |                                                                                       |
| 97 | 4.65 | 0.016 | 236A → 273A | 0.10127  |  |
|    |      |       | 239A → 273A | 0.11873  |                                                                                       |
|    |      |       | 244A → 273A | 0.12617  |                                                                                       |
|    |      |       | 248A → 273A | 0.22276  |                                                                                       |
|    |      |       | 250A → 273A | 0.10606  |                                                                                       |
|    |      |       | 263A → 273A | 0.11916  |                                                                                       |
|    |      |       | 264A → 275A | 0.10237  |                                                                                       |
|    |      |       | 265A → 273A | -0.11933 |                                                                                       |
|    |      |       | 266A → 275A | 0.10855  |                                                                                       |
|    |      |       | 267A → 273A | -0.21869 |                                                                                       |
|    |      |       | 271A → 276A | 0.12296  |                                                                                       |
|    |      |       | 239B → 273B | -0.16661 |                                                                                       |
|    |      |       | 243B → 273B | -0.10626 |                                                                                       |

|     |      |       |             |          |                                                                                       |
|-----|------|-------|-------------|----------|---------------------------------------------------------------------------------------|
|     |      |       | 247B → 273B | -0.11408 |                                                                                       |
|     |      |       | 248B → 272B | 0.10888  |                                                                                       |
|     |      |       | 254B → 272B | -0.10372 |                                                                                       |
|     |      |       | 255B → 272B | -0.10158 |                                                                                       |
|     |      |       | 265B → 272B | -0.12438 |                                                                                       |
|     |      |       | 266B → 273B | -0.10972 |                                                                                       |
|     |      |       | 266B → 274B | 0.12317  |                                                                                       |
|     |      |       | 267B → 273B | 0.10526  |                                                                                       |
|     |      |       | 268B → 273B | -0.16116 |                                                                                       |
|     |      |       | 269B → 272B | -0.10813 |                                                                                       |
|     |      |       | 270B → 275B | 0.13361  |                                                                                       |
|     |      |       | 271B → 277B | 0.11401  |                                                                                       |
| 103 | 4.70 | 0.002 | 238A → 275A | -0.11987 | 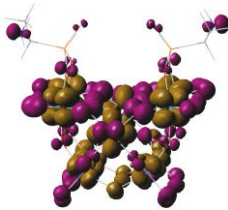   |
|     |      |       | 239A → 273A | 0.14062  |                                                                                       |
|     |      |       | 244A → 273A | -0.14198 |                                                                                       |
|     |      |       | 244A → 274A | -0.10461 |                                                                                       |
|     |      |       | 250A → 273A | 0.19263  |                                                                                       |
|     |      |       | 250A → 274A | 0.18103  |                                                                                       |
|     |      |       | 253A → 273A | 0.18991  |                                                                                       |
|     |      |       | 253A → 274A | 0.10061  |                                                                                       |
|     |      |       | 256A → 273A | -0.16894 |                                                                                       |
|     |      |       | 260A → 277A | 0.27891  |                                                                                       |
|     |      |       | 260A → 278A | 0.10077  |                                                                                       |
|     |      |       | 270A → 275A | 0.14286  |                                                                                       |
|     |      |       | 244B → 274B | 0.10400  |                                                                                       |
|     |      |       | 245B → 272B | 0.18469  |                                                                                       |
|     |      |       | 250B → 273B | 0.22772  |                                                                                       |
|     |      |       | 252B → 275B | 0.12807  |                                                                                       |
|     |      |       | 253B → 273B | 0.13837  |                                                                                       |
|     |      |       | 260B → 275B | -0.15832 |                                                                                       |
|     |      |       | 261B → 275B | -0.21421 |                                                                                       |
|     |      |       | 263B → 274B | 0.13291  |                                                                                       |
| 134 | 4.86 | 0.019 | 238A → 273A | 0.11894  |  |
|     |      |       | 241A → 273A | -0.11185 |                                                                                       |
|     |      |       | 245A → 273A | -0.20982 |                                                                                       |
|     |      |       | 250A → 275A | -0.14643 |                                                                                       |
|     |      |       | 253A → 275A | -0.11684 |                                                                                       |
|     |      |       | 255A → 277A | -0.18018 |                                                                                       |
|     |      |       | 256A → 275A | 0.11691  |                                                                                       |
|     |      |       | 259A → 273A | 0.20846  |                                                                                       |
|     |      |       | 260A → 276A | -0.11265 |                                                                                       |
|     |      |       | 270A → 274A | -0.13965 |                                                                                       |
|     |      |       | 272A → 308A | 0.10397  |                                                                                       |
|     |      |       | 244B → 272B | 0.17896  |                                                                                       |

|     |      |       |             |          |                                                                                       |
|-----|------|-------|-------------|----------|---------------------------------------------------------------------------------------|
|     |      |       | 250B → 272B | -0.17982 |                                                                                       |
|     |      |       | 253B → 272B | -0.12327 |                                                                                       |
|     |      |       | 263B → 272B | -0.17395 |                                                                                       |
|     |      |       | 270B → 274B | 0.21997  |                                                                                       |
|     |      |       | 271B → 276B | 0.14165  |                                                                                       |
| 137 | 4.88 | 0.012 | 235A → 273A | 0.10377  | 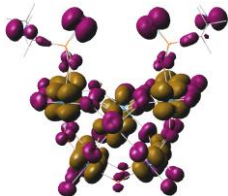   |
|     |      |       | 238A → 273A | 0.10286  |                                                                                       |
|     |      |       | 244A → 275A | 0.12847  |                                                                                       |
|     |      |       | 245A → 273A | -0.13029 |                                                                                       |
|     |      |       | 250A → 275A | -0.11325 |                                                                                       |
|     |      |       | 251A → 277A | 0.12802  |                                                                                       |
|     |      |       | 255A → 277A | -0.13068 |                                                                                       |
|     |      |       | 256A → 275A | 0.12847  |                                                                                       |
|     |      |       | 264A → 274A | -0.11205 |                                                                                       |
|     |      |       | 265A → 275A | -0.13135 |                                                                                       |
|     |      |       | 266A → 273A | 0.19056  |                                                                                       |
|     |      |       | 240B → 273B | -0.11409 |                                                                                       |
|     |      |       | 241B → 274B | 0.11194  |                                                                                       |
|     |      |       | 244B → 272B | -0.15706 |                                                                                       |
|     |      |       | 246B → 272B | 0.13096  |                                                                                       |
|     |      |       | 247B → 272B | 0.18669  |                                                                                       |
|     |      |       | 251B → 275B | -0.11160 |                                                                                       |
|     |      |       | 255B → 273B | 0.11512  |                                                                                       |
|     |      |       | 256B → 275B | -0.11257 |                                                                                       |
|     |      |       | 257B → 272B | 0.11493  |                                                                                       |
|     |      |       | 265B → 273B | 0.15040  |                                                                                       |
|     |      |       | 266B → 272B | 0.13883  |                                                                                       |
|     |      |       | 266B → 276B | 0.12232  |                                                                                       |
|     |      |       | 270B → 274B | -0.16825 |                                                                                       |
|     |      |       | 271B → 276B | -0.11666 |                                                                                       |
| 161 | 5.00 | 0.008 | 237A → 273A | -0.10989 |  |
|     |      |       | 240A → 273A | 0.16699  |                                                                                       |
|     |      |       | 241A → 273A | 0.24238  |                                                                                       |
|     |      |       | 242A → 273A | -0.21982 |                                                                                       |
|     |      |       | 246A → 275A | 0.11294  |                                                                                       |
|     |      |       | 247A → 273A | 0.20895  |                                                                                       |
|     |      |       | 249A → 275A | -0.11235 |                                                                                       |
|     |      |       | 252A → 273A | 0.26478  |                                                                                       |
|     |      |       | 257A → 273A | -0.18467 |                                                                                       |
|     |      |       | 262A → 273A | -0.19276 |                                                                                       |
|     |      |       | 246B → 272B | 0.10930  |                                                                                       |
|     |      |       | 256B → 272B | 0.23859  |                                                                                       |

|             |          |       |             |          |                                                                                     |
|-------------|----------|-------|-------------|----------|-------------------------------------------------------------------------------------|
| 163         | 5.01     | 0.009 | 233A → 273A | 0.16718  | 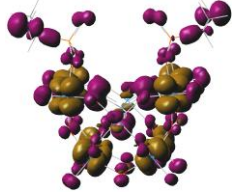 |
|             |          |       | 241A → 273A | -0.11465 |                                                                                     |
|             |          |       | 244A → 275A | 0.14249  |                                                                                     |
|             |          |       | 245A → 273A | 0.12650  |                                                                                     |
|             |          |       | 247A → 273A | 0.17715  |                                                                                     |
|             |          |       | 248A → 275A | 0.13198  |                                                                                     |
|             |          |       | 263A → 275A | 0.11713  |                                                                                     |
|             |          |       | 246B → 272B | -0.13236 |                                                                                     |
|             |          |       | 256B → 272B | -0.16448 |                                                                                     |
|             |          |       | 270B → 281B | -0.12888 |                                                                                     |
| 271B → 278B | -0.13004 |       |             |          |                                                                                     |

Table S3 The selected excited states of aRR conformation for 2e-RED.

| excitation | $\Delta E(\text{eV})$ | $f$   | MO        | coefficient | EDDM                                                                                 |
|------------|-----------------------|-------|-----------|-------------|--------------------------------------------------------------------------------------|
| 36         | 4.39                  | 0.032 | 246 → 273 | -0.18156    | 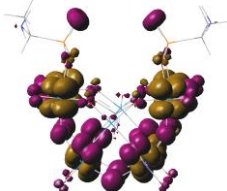   |
|            |                       |       | 256 → 274 | -0.14115    |                                                                                      |
|            |                       |       | 261 → 273 | 0.10072     |                                                                                      |
|            |                       |       | 263 → 273 | 0.39221     |                                                                                      |
|            |                       |       | 264 → 273 | 0.14306     |                                                                                      |
|            |                       |       | 265 → 273 | -0.10835    |                                                                                      |
|            |                       |       | 267 → 274 | -0.23719    |                                                                                      |
|            |                       |       | 269 → 273 | 0.10278     |                                                                                      |
| 37         | 4.40                  | 0.039 | 247 → 274 | 0.10878     |  |
|            |                       |       | 250 → 274 | -0.10612    |                                                                                      |
|            |                       |       | 253 → 273 | -0.10096    |                                                                                      |
|            |                       |       | 261 → 273 | 0.22463     |                                                                                      |
|            |                       |       | 263 → 273 | -0.17136    |                                                                                      |
|            |                       |       | 264 → 273 | 0.37217     |                                                                                      |
|            |                       |       | 267 → 274 | 0.13761     |                                                                                      |
|            |                       |       | 267 → 278 | 0.12947     |                                                                                      |
| 269 → 273  | 0.20977               |       |           |             |                                                                                      |
| 55         | 4.83                  | 0.011 | 246 → 273 | -0.16936    |  |
|            |                       |       | 254 → 275 | -0.10750    |                                                                                      |
|            |                       |       | 257 → 277 | -0.17688    |                                                                                      |
|            |                       |       | 260 → 275 | -0.13345    |                                                                                      |
|            |                       |       | 270 → 273 | -0.18057    |                                                                                      |
|            |                       |       | 270 → 275 | 0.26834     |                                                                                      |
|            |                       |       | 271 → 274 | 0.30007     |                                                                                      |
|            |                       |       | 271 → 282 | -0.10380    |                                                                                      |
| 272 → 313  | -0.17050              |       |           |             |                                                                                      |

|           |         |       |           |          |                                                                                      |
|-----------|---------|-------|-----------|----------|--------------------------------------------------------------------------------------|
| 90        | 5.20    | 0.004 | 236 → 273 | 0.17546  | 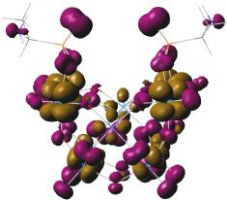   |
|           |         |       | 239 → 273 | -0.12707 |                                                                                      |
|           |         |       | 243 → 273 | -0.10086 |                                                                                      |
|           |         |       | 248 → 273 | -0.14477 |                                                                                      |
|           |         |       | 249 → 273 | -0.12014 |                                                                                      |
|           |         |       | 254 → 274 | 0.12813  |                                                                                      |
|           |         |       | 256 → 273 | -0.10251 |                                                                                      |
|           |         |       | 260 → 274 | 0.10582  |                                                                                      |
|           |         |       | 263 → 274 | 0.17487  |                                                                                      |
|           |         |       | 264 → 277 | 0.13026  |                                                                                      |
|           |         |       | 266 → 273 | 0.15715  |                                                                                      |
|           |         |       | 267 → 273 | 0.12716  |                                                                                      |
| 269 → 277 | 0.10054 |       |           |          |                                                                                      |
| 97        | 5.25    | 0.044 | 244 → 278 | 0.10096  |    |
|           |         |       | 259 → 275 | -0.12228 |                                                                                      |
|           |         |       | 261 → 275 | -0.12195 |                                                                                      |
|           |         |       | 261 → 279 | 0.10079  |                                                                                      |
|           |         |       | 264 → 276 | -0.11498 |                                                                                      |
|           |         |       | 267 → 281 | 0.13235  |                                                                                      |
|           |         |       | 269 → 276 | -0.11001 |                                                                                      |
|           |         |       | 270 → 275 | -0.10888 |                                                                                      |
| 271 → 274 | 0.10198 |       |           |          |                                                                                      |
| 114       | 5.39    | 0.025 | 232 → 273 | 0.15904  |  |
|           |         |       | 236 → 273 | 0.10947  |                                                                                      |
|           |         |       | 242 → 274 | -0.11298 |                                                                                      |
|           |         |       | 245 → 274 | 0.12541  |                                                                                      |
|           |         |       | 248 → 276 | 0.16757  |                                                                                      |
|           |         |       | 252 → 273 | 0.10135  |                                                                                      |
|           |         |       | 255 → 274 | 0.11243  |                                                                                      |
|           |         |       | 256 → 276 | 0.12726  |                                                                                      |
|           |         |       | 258 → 275 | 0.10608  |                                                                                      |
| 262 → 276 | 0.12780 |       |           |          |                                                                                      |
| 186       | 5.84    | 0.012 | 257 → 279 | 0.12067  |  |
| 191       | 5.86    | 0.028 | 238 → 273 | -0.10057 |  |
|           |         |       | 268 → 281 | -0.13489 |                                                                                      |
|           |         |       | 269 → 279 | 0.16163  |                                                                                      |
|           |         |       | 270 → 289 | -0.11357 |                                                                                      |
|           |         |       | 271 → 278 | 0.10307  |                                                                                      |
|           |         |       | 271 → 288 | -0.14335 |                                                                                      |

Cartesian coordinates (Angstrom) of studied compounds:

aRR\_OXD:

| Atom | X         | Y         | Z         |
|------|-----------|-----------|-----------|
| 1.P  | -0.087660 | 2.780665  | 3.987832  |
| 2.O  | -0.056032 | 1.821154  | 5.136451  |
| 3.O  | -1.369254 | 2.594877  | 3.059749  |
| 4.W  | -1.759156 | 2.876172  | 1.107059  |
| 5.O  | -0.046094 | 1.389213  | 0.958677  |
| 6.Si | 0.000000  | 0.000000  | 0.107639  |
| 7.O  | 0.046094  | -1.389213 | 0.958677  |
| 8.W  | 1.759156  | -2.876172 | 1.107059  |
| 9.O  | 1.369254  | -2.594877 | 3.059749  |
| 10.P | 0.087660  | -2.780665 | 3.987832  |
| 11.O | -2.942062 | 4.151450  | 1.314249  |
| 12.O | -0.134226 | 3.957286  | 1.084162  |
| 13.W | 1.561139  | 2.992093  | 1.094639  |
| 14.O | 1.197952  | 2.684489  | 3.054373  |
| 15.O | -2.909474 | 1.307719  | 1.111541  |
| 16.W | -3.598424 | -0.122428 | 0.001658  |
| 17.O | -1.359164 | -0.045419 | -0.848037 |
| 18.W | -1.850643 | -1.764865 | -2.378217 |
| 19.O | 0.059511  | -1.765261 | -2.683081 |
| 20.W | 1.966117  | -1.645136 | -2.370055 |
| 21.O | 1.359164  | 0.045419  | -0.848037 |
| 22.W | 1.850643  | 1.764865  | -2.378217 |
| 23.O | 2.065774  | 0.065620  | -3.319005 |
| 24.O | -1.737545 | 2.814688  | -0.817685 |
| 25.W | -1.966117 | 1.645136  | -2.370055 |
| 26.O | -0.059511 | 1.765261  | -2.683081 |
| 27.O | 2.942062  | -4.151450 | 1.314249  |
| 28.O | 0.134226  | -3.957286 | 1.084162  |
| 29.W | -1.561139 | -2.992093 | 1.094639  |
| 30.O | -1.197952 | -2.684489 | 3.054373  |
| 31.O | -2.656131 | -4.343609 | 1.307835  |
| 32.O | -2.814581 | -1.503575 | 1.108608  |
| 33.O | -1.545807 | -2.924745 | -0.824392 |
| 34.O | 2.909474  | -1.307719 | 1.111541  |
| 35.W | 3.598424  | 0.122428  | 0.001658  |
| 36.O | 3.540874  | 1.411158  | -1.470125 |
| 37.O | 1.737545  | -2.814688 | -0.817685 |
| 38.O | 2.656131  | 4.343609  | 1.307835  |
| 39.O | 2.814581  | 1.503575  | 1.108608  |

|      |           |           |           |
|------|-----------|-----------|-----------|
| 40.O | 1.545807  | 2.924745  | -0.824392 |
| 41.O | -5.281643 | -0.183167 | 0.464981  |
| 42.O | -3.628829 | 1.170037  | -1.467686 |
| 43.O | -3.540874 | -1.411158 | -1.470125 |
| 44.O | 5.281643  | 0.183167  | 0.464981  |
| 45.O | 3.628829  | -1.170037 | -1.467686 |
| 46.O | -2.577394 | 2.740699  | -3.587150 |
| 47.O | -2.065774 | -0.065620 | -3.319005 |
| 48.O | -2.388118 | -2.898158 | -3.595653 |
| 49.O | 2.577394  | -2.740699 | -3.587150 |
| 50.O | 2.388118  | 2.898158  | -3.595653 |
| 51.O | 0.056032  | -1.821154 | 5.136451  |
| 52.C | -0.136527 | 4.536109  | 4.545442  |
| 53.H | -0.323631 | 5.127321  | 3.636312  |
| 54.C | 0.136527  | -4.536109 | 4.545442  |
| 55.H | 0.323631  | -5.127321 | 3.636312  |
| 56.C | 1.195827  | 4.973365  | 5.173016  |
| 57.H | 2.029842  | 4.887499  | 4.463075  |
| 58.H | 1.119078  | 6.023538  | 5.490175  |
| 59.H | 1.427670  | 4.363766  | 6.058875  |
| 60.C | -1.195827 | -4.973365 | 5.173016  |
| 61.H | -2.029842 | -4.887499 | 4.463075  |
| 62.H | -1.119078 | -6.023538 | 5.490175  |
| 63.H | -1.427670 | -4.363766 | 6.058875  |
| 64.N | -1.311205 | 4.683784  | 5.424034  |
| 65.H | -1.131917 | 4.190070  | 6.303587  |
| 66.H | -1.415092 | 5.671387  | 5.672559  |
| 67.N | 1.311205  | -4.683784 | 5.424034  |
| 68.H | 1.131917  | -4.190070 | 6.303587  |
| 69.H | 1.415092  | -5.671387 | 5.672559  |

bRR\_OXD:

| Atom | X         | Y         | Z        |
|------|-----------|-----------|----------|
| 1.P  | -2.706924 | 0.175334  | 4.006683 |
| 2.O  | -1.550646 | 0.096433  | 4.949307 |
| 3.O  | -2.845699 | -1.103418 | 3.057522 |
| 4.W  | -3.054621 | -1.475618 | 1.095217 |
| 5.O  | -1.391255 | 0.086201  | 0.980735 |
| 6.Si | 0.000000  | 0.000000  | 0.127964 |
| 7.O  | 1.391255  | -0.086201 | 0.980735 |
| 8.W  | 3.054621  | 1.475618  | 1.095217 |
| 9.O  | 2.845699  | 1.103418  | 3.057522 |
| 10.P | 2.706924  | -0.175334 | 4.006683 |
| 11.O | -4.427820 | -2.549822 | 1.264880 |
| 12.O | -3.969922 | 0.245538  | 1.028620 |

|      |           |           |           |
|------|-----------|-----------|-----------|
| 13.W | -2.850384 | 1.837021  | 1.083784  |
| 14.O | -2.668021 | 1.452778  | 3.049716  |
| 15.O | -1.586616 | -2.753083 | 1.117172  |
| 16.W | -0.219630 | -3.574452 | 0.010328  |
| 17.O | -0.084016 | -1.351541 | -0.838418 |
| 18.W | 1.581368  | -2.009997 | -2.381417 |
| 19.O | 1.760508  | -0.109861 | -2.694543 |
| 20.W | 1.824577  | 1.798694  | -2.373556 |
| 21.O | 0.084016  | 1.351541  | -0.838418 |
| 22.W | -1.581368 | 2.009997  | -2.381417 |
| 23.O | 0.131544  | 2.064148  | -3.318442 |
| 24.O | -2.966834 | -1.453117 | -0.829078 |
| 25.W | -1.824577 | -1.798694 | -2.373556 |
| 26.O | -1.760508 | 0.109861  | -2.694543 |
| 27.O | 4.427820  | 2.549822  | 1.264880  |
| 28.O | 3.969922  | -0.245538 | 1.028620  |
| 29.W | 2.850384  | -1.837021 | 1.083784  |
| 30.O | 2.668021  | -1.452778 | 3.049716  |
| 31.O | 4.085500  | -3.066536 | 1.269951  |
| 32.O | 1.236318  | -2.930029 | 1.113371  |
| 33.O | 2.763928  | -1.813104 | -0.835770 |
| 34.O | 1.586616  | 2.753083  | 1.117172  |
| 35.W | 0.219630  | 3.574452  | 0.010328  |
| 36.O | -1.064068 | 3.654511  | -1.464910 |
| 37.O | 2.966834  | 1.453117  | -0.829078 |
| 38.O | -4.085500 | 3.066536  | 1.269951  |
| 39.O | -1.236318 | 2.930029  | 1.113371  |
| 40.O | -2.763928 | 1.813104  | -0.835770 |
| 41.O | -0.325442 | -5.254419 | 0.480292  |
| 42.O | -1.509399 | -3.494144 | -1.461169 |
| 43.O | 1.064068  | -3.654511 | -1.464910 |
| 44.O | 0.325442  | 5.254419  | 0.480292  |
| 45.O | 1.509399  | 3.494144  | -1.461169 |
| 46.O | -2.969967 | -2.308143 | -3.591954 |
| 47.O | -0.131544 | -2.064148 | -3.318442 |
| 48.O | 2.654264  | -2.659003 | -3.599664 |
| 49.O | 2.969967  | 2.308143  | -3.591954 |
| 50.O | -2.654264 | 2.659003  | -3.599664 |
| 51.O | 1.550646  | -0.096433 | 4.949307  |
| 52.C | -4.326236 | 0.325293  | 4.895668  |
| 53.H | -4.204162 | 1.244788  | 5.489862  |
| 54.C | 4.326236  | -0.325293 | 4.895668  |
| 55.H | 4.204162  | -1.244788 | 5.489862  |
| 56.C | -4.533567 | -0.855437 | 5.846807  |
| 57.H | -3.676963 | -0.974549 | 6.521208  |
| 58.H | -5.436592 | -0.686862 | 6.449028  |
| 59.H | -4.664500 | -1.791877 | 5.285391  |
| 60.C | 4.533567  | 0.855437  | 5.846807  |
| 61.H | 3.676963  | 0.974549  | 6.521208  |
| 62.H | 5.436592  | 0.686862  | 6.449028  |



|      |           |           |          |
|------|-----------|-----------|----------|
| 63.H | 4.664500  | 1.791877  | 5.285391 |
| 64.N | -5.502883 | 0.502690  | 4.031682 |
| 65.H | -5.357170 | 1.289782  | 3.394652 |
| 66.H | -5.616631 | -0.321978 | 3.434726 |
| 67.N | 5.502883  | -0.502690 | 4.031682 |
| 68.H | 5.357170  | -1.289782 | 3.394652 |
| 69.H | 5.616631  | 0.321978  | 3.434726 |

cRR\_OXD (BP86/6-31+G\*\*/Lanl2DZ):

| Atom | X         | Y         | Z         |
|------|-----------|-----------|-----------|
| 1.P  | 2.823009  | -0.032871 | 4.039790  |
| 2.O  | 1.720017  | -0.066614 | 5.069425  |
| 3.O  | 2.795717  | 1.270165  | 3.059818  |
| 4.W  | 2.960942  | 1.654907  | 1.109563  |
| 5.O  | 1.415288  | -0.008450 | 1.017740  |
| 6.Si | 0.000000  | 0.000000  | 0.158927  |
| 7.O  | -1.415288 | 0.008450  | 1.017740  |
| 8.W  | -2.960942 | -1.654907 | 1.109563  |
| 9.O  | -2.795717 | -1.270165 | 3.059818  |
| 10.P | -2.823009 | 0.032871  | 4.039790  |
| 11.O | 4.254368  | 2.802631  | 1.269247  |
| 12.O | 3.965377  | -0.005060 | 1.025760  |
| 13.W | 2.980048  | -1.674816 | 1.089495  |
| 14.O | 2.819931  | -1.323979 | 3.041541  |
| 15.O | 1.414726  | 2.839150  | 1.118794  |
| 16.W | 0.000000  | 3.575514  | 0.021517  |
| 17.O | 0.001633  | 1.369875  | -0.825502 |
| 18.W | -1.701328 | 1.906714  | -2.367421 |
| 19.O | -1.768119 | 0.000993  | -2.681184 |
| 20.W | -1.710943 | -1.902599 | -2.357839 |
| 21.O | -0.001633 | -1.369875 | -0.825502 |
| 22.W | 1.701328  | -1.906714 | -2.367421 |
| 23.O | -0.007579 | -2.066952 | -3.290854 |
| 24.O | 2.858185  | 1.637790  | -0.810258 |
| 25.W | 1.710943  | 1.902599  | -2.357839 |
| 26.O | 1.768119  | -0.000993 | -2.681184 |
| 27.O | -4.254368 | -2.802631 | 1.269247  |
| 28.O | -3.965377 | 0.005060  | 1.025760  |
| 29.W | -2.980048 | 1.674816  | 1.089495  |
| 30.O | -2.819931 | 1.323979  | 3.041541  |
| 31.O | -4.278679 | 2.819053  | 1.221602  |
| 32.O | -1.433323 | 2.858176  | 1.104022  |
| 33.O | -2.859961 | 1.642581  | -0.828503 |
| 34.O | -1.414726 | -2.839150 | 1.118794  |
| 35.W | 0.000000  | -3.575514 | 0.021517  |
| 36.O | 1.275100  | -3.568969 | -1.456012 |
| 37.O | -2.858185 | -1.637790 | -0.810258 |
| 38.O | 4.278679  | -2.819053 | 1.221602  |
| 39.O | 1.433323  | -2.858176 | 1.104022  |

|      |           |           |           |
|------|-----------|-----------|-----------|
| 40.O | 2.859961  | -1.642581 | -0.828503 |
| 41.O | 0.005162  | 5.247782  | 0.480742  |
| 42.O | 1.283467  | 3.566353  | -1.446488 |
| 43.O | -1.275100 | 3.568969  | -1.456012 |
| 44.O | -0.005162 | -5.247782 | 0.480742  |
| 45.O | -1.283467 | -3.566353 | -1.446488 |
| 46.O | 2.814637  | 2.483548  | -3.562436 |
| 47.O | 0.007579  | 2.066952  | -3.290854 |
| 48.O | -2.796058 | 2.486952  | -3.580317 |
| 49.O | -2.814637 | -2.483548 | -3.562436 |
| 50.O | 2.796058  | -2.486952 | -3.580317 |
| 51.O | -1.720017 | 0.066614  | 5.069425  |
| 52.C | 4.487268  | -0.022512 | 4.892966  |
| 53.H | 4.540919  | 1.014828  | 5.298341  |
| 54.C | -4.487268 | 0.022512  | 4.892966  |
| 55.H | -4.540919 | -1.014828 | 5.298341  |
| 56.C | 5.691345  | -0.263686 | 3.981978  |
| 57.H | 5.720847  | 0.454062  | 3.139535  |
| 58.H | 6.625885  | -0.160383 | 4.571229  |
| 59.H | 5.666029  | -1.287298 | 3.553754  |
| 60.C | -5.691345 | 0.263686  | 3.981978  |
| 61.H | -5.720847 | -0.454062 | 3.139535  |
| 62.H | -6.625885 | 0.160383  | 4.571229  |
| 63.H | -5.666029 | 1.287298  | 3.553754  |
| 64.N | 4.487921  | -0.953464 | 6.026634  |
| 65.H | 3.609998  | -0.826110 | 6.553412  |
| 66.H | 4.446825  | -1.920278 | 5.667890  |
| 67.N | -4.487921 | 0.953464  | 6.026634  |
| 68.H | -3.609998 | 0.826110  | 6.553412  |
| 69.H | -4.446825 | 1.920278  | 5.667890  |

cRR\_OXD (BP86/TZ2P):

| Atom | X         | Y         | Z        |
|------|-----------|-----------|----------|
| 1.P  | -2.749605 | -0.253773 | 4.016028 |
| 2.O  | -1.639922 | -0.138998 | 5.012218 |
| 3.O  | -2.622330 | -1.527634 | 3.065034 |
| 4.W  | -2.796087 | -1.917850 | 1.101664 |
| 5.O  | -1.387661 | -0.124029 | 0.996041 |
| 6.Si | 0.000000  | 0.000000  | 0.143419 |
| 7.O  | 1.387661  | 0.124029  | 0.996041 |
| 8.W  | 2.796087  | 1.917850  | 1.101664 |
| 9.O  | 2.622330  | 1.527634  | 3.065034 |
| 10.P | 2.749605  | 0.253773  | 4.016028 |
| 11.O | -3.993117 | -3.184672 | 1.277504 |
| 12.O | -3.959272 | -0.357259 | 1.041237 |
| 13.W | -3.093848 | 1.385988  | 1.106761 |
| 14.O | -2.873331 | 1.028602  | 3.073894 |
| 15.O | -1.153205 | -2.963185 | 1.125904 |
| 16.W | 0.322257  | -3.565133 | 0.023968 |

|      |           |           |           |
|------|-----------|-----------|-----------|
| 17.O | 0.120932  | -1.348192 | -0.823751 |
| 18.W | 1.870679  | -1.745110 | -2.361913 |
| 19.O | 1.755823  | 0.158839  | -2.682236 |
| 20.W | 1.526865  | 2.054552  | -2.363864 |
| 21.O | -0.120932 | 1.348192  | -0.823751 |
| 22.W | -1.870679 | 1.745110  | -2.361913 |
| 23.O | -0.186944 | 2.059808  | -3.303919 |
| 24.O | -2.710267 | -1.886753 | -0.820217 |
| 25.W | -1.526865 | -2.054552 | -2.363864 |
| 26.O | -1.755823 | -0.158839 | -2.682236 |
| 27.O | 3.993117  | 3.184672  | 1.277504  |
| 28.O | 3.959272  | 0.357259  | 1.041237  |
| 29.W | 3.093848  | -1.385988 | 1.106761  |
| 30.O | 2.873331  | -1.028602 | 3.073894  |
| 31.O | 4.492583  | -2.426263 | 1.276333  |
| 32.O | 1.660986  | -2.705696 | 1.131647  |
| 33.O | 3.002315  | -1.371631 | -0.815972 |
| 34.O | 1.153205  | 2.963185  | 1.125904  |
| 35.W | -0.322257 | 3.565133  | 0.023968  |
| 36.O | -1.604650 | 3.450180  | -1.448462 |
| 37.O | 2.710267  | 1.886753  | -0.820217 |
| 38.O | -4.492583 | 2.426263  | 1.276333  |
| 39.O | -1.660986 | 2.705696  | 1.131647  |
| 40.O | -3.002315 | 1.371631  | -0.815972 |
| 41.O | 0.472240  | -5.241422 | 0.495536  |
| 42.O | -0.961279 | -3.682752 | -1.450679 |
| 43.O | 1.604650  | -3.450180 | -1.448462 |
| 44.O | -0.472240 | 5.241422  | 0.495536  |
| 45.O | 0.961279  | 3.682752  | -1.450679 |
| 46.O | -2.581531 | -2.731857 | -3.582412 |
| 47.O | 0.186944  | -2.059808 | -3.303919 |
| 48.O | 3.031154  | -2.225268 | -3.578013 |
| 49.O | 2.581531  | 2.731857  | -3.582412 |
| 50.O | -3.031154 | 2.225268  | -3.578013 |
| 51.O | 1.639922  | 0.138998  | 5.012218  |
| 52.C | -4.372058 | -0.436362 | 4.895262  |
| 53.H | -4.276967 | -1.415130 | 5.392226  |
| 54.C | 4.372058  | 0.436362  | 4.895262  |
| 55.H | 4.276967  | 1.415130  | 5.392226  |
| 56.C | -5.597994 | -0.450088 | 3.987659  |
| 57.H | -5.519257 | -1.229373 | 3.220699  |
| 58.H | -6.496536 | -0.640705 | 4.590433  |
| 59.H | -5.720468 | 0.517171  | 3.480115  |
| 60.C | 5.597994  | 0.450088  | 3.987659  |
| 61.H | 5.519257  | 1.229373  | 3.220699  |
| 62.H | 6.496536  | 0.640705  | 4.590433  |
| 63.H | 5.720468  | -0.517171 | 3.480115  |
| 64.N | -4.521992 | 0.583726  | 5.948566  |
| 65.H | -3.663397 | 0.631346  | 6.504381  |
| 66.H | -4.629097 | 1.506865  | 5.516596  |

|      |          |           |          |
|------|----------|-----------|----------|
| 67.N | 4.521992 | -0.583726 | 5.948566 |
| 68.H | 3.663397 | -0.631346 | 6.504381 |
| 69.H | 4.629097 | -1.506865 | 5.516596 |

aRR\_1e-RED:

| Atom | X         | Y         | Z         |
|------|-----------|-----------|-----------|
| 1.P  | -0.088566 | 2.846872  | 3.985010  |
| 2.O  | -0.073965 | 2.000995  | 5.225962  |
| 3.O  | -1.371363 | 2.572812  | 3.085746  |
| 4.W  | -1.756200 | 2.870528  | 1.104198  |
| 5.O  | -0.044057 | 1.392373  | 0.952879  |
| 6.Si | 0.000146  | 0.000394  | 0.106454  |
| 7.O  | 0.044456  | -1.390785 | 0.954648  |
| 8.W  | 1.755784  | -2.869614 | 1.105339  |
| 9.O  | 1.371477  | -2.579169 | 3.088123  |
| 10.P | 0.087922  | -2.850746 | 3.987344  |
| 11.O | -2.923046 | 4.162194  | 1.348838  |
| 12.O | -0.120824 | 3.941776  | 1.110337  |
| 13.W | 1.577056  | 2.972912  | 1.106704  |
| 14.O | 1.208566  | 2.649846  | 3.087066  |
| 15.O | -2.894254 | 1.302344  | 1.142488  |
| 16.W | -3.608706 | -0.110307 | -0.005563 |
| 17.O | -1.359415 | -0.041798 | -0.850660 |
| 18.W | -1.849164 | -1.767185 | -2.372049 |
| 19.O | 0.054816  | -1.767766 | -2.685543 |
| 20.W | 1.954981  | -1.648935 | -2.374496 |
| 21.O | 1.359742  | 0.041987  | -0.850683 |
| 22.W | 1.849812  | 1.767126  | -2.373124 |
| 23.O | 2.102856  | 0.065259  | -3.298266 |
| 24.O | -1.758659 | 2.825370  | -0.806991 |
| 25.W | -1.954467 | 1.648392  | -2.374491 |
| 26.O | -0.054244 | 1.767083  | -2.686593 |
| 27.O | 2.923906  | -4.160833 | 1.347980  |
| 28.O | 0.120287  | -3.940586 | 1.110489  |
| 29.W | -1.577138 | -2.970622 | 1.108441  |
| 30.O | -1.207803 | -2.650221 | 3.088951  |
| 31.O | -2.667287 | -4.328851 | 1.345405  |
| 32.O | -2.806999 | -1.473067 | 1.144309  |
| 33.O | -1.580008 | -2.925672 | -0.803001 |
| 34.O | 2.893530  | -1.300769 | 1.144425  |
| 35.W | 3.607637  | 0.110806  | -0.004941 |
| 36.O | 3.569384  | 1.416545  | -1.433024 |
| 37.O | 1.759374  | -2.824322 | -0.805013 |
| 38.O | 2.666134  | 4.332261  | 1.343171  |
| 39.O | 2.806387  | 1.474867  | 1.143623  |
| 40.O | 1.580400  | 2.926685  | -0.804944 |
| 41.O | -5.289070 | -0.162774 | 0.491562  |
| 42.O | -3.649039 | 1.193662  | -1.434215 |
| 43.O | -3.568684 | -1.416431 | -1.432973 |

|      |           |           |           |
|------|-----------|-----------|-----------|
| 44.O | 5.288078  | 0.163387  | 0.492280  |
| 45.O | 3.649637  | -1.193788 | -1.433588 |
| 46.O | -2.574802 | 2.742102  | -3.593900 |
| 47.O | -2.102199 | -0.066117 | -3.298833 |
| 48.O | -2.400752 | -2.898894 | -3.590019 |
| 49.O | 2.574773  | -2.742291 | -3.594413 |
| 50.O | 2.401082  | 2.898165  | -3.591754 |
| 51.O | 0.074838  | -2.010769 | 5.232201  |
| 52.C | -0.175284 | 4.655016  | 4.381832  |
| 53.H | -0.161288 | 5.177769  | 3.414347  |
| 54.C | 0.171572  | -4.660881 | 4.375817  |
| 55.H | 0.144705  | -5.179622 | 3.406379  |
| 56.C | 1.023001  | 5.101324  | 5.218922  |
| 57.H | 1.968986  | 4.875498  | 4.710468  |
| 58.H | 0.970234  | 6.184818  | 5.394165  |
| 59.H | 1.027440  | 4.592440  | 6.193749  |
| 60.C | -1.019120 | -5.105685 | 5.224208  |
| 61.H | -1.969829 | -4.874591 | 4.727104  |
| 62.H | -0.968381 | -6.189948 | 5.395225  |
| 63.H | -1.010720 | -4.599797 | 6.200541  |
| 64.N | -1.436883 | 5.005721  | 5.063985  |
| 65.H | -2.232114 | 4.708688  | 4.491168  |
| 66.H | -1.507671 | 4.467903  | 5.933938  |
| 67.N | 1.438836  | -5.020580 | 5.042650  |
| 68.H | 2.228963  | -4.718372 | 4.465495  |
| 69.H | 1.518694  | -4.492168 | 5.917604  |

bRR\_1e-RED:

| Atom | X         | Y         | Z         |
|------|-----------|-----------|-----------|
| 1.P  | -2.710337 | 0.175102  | 4.016407  |
| 2.O  | -1.616579 | 0.106645  | 5.039594  |
| 3.O  | -2.786213 | -1.111981 | 3.083636  |
| 4.W  | -3.035458 | -1.482462 | 1.099065  |
| 5.O  | -1.389698 | 0.086969  | 0.966803  |
| 6.Si | 0.000677  | 0.000199  | 0.115344  |
| 7.O  | 1.391921  | -0.086751 | 0.965537  |
| 8.W  | 3.038796  | 1.482067  | 1.094802  |
| 9.O  | 2.791318  | 1.112915  | 3.080180  |
| 10.P | 2.703712  | -0.173032 | 4.012330  |
| 11.O | -4.420516 | -2.543463 | 1.310687  |
| 12.O | -3.949725 | 0.241788  | 1.064356  |
| 13.W | -2.830307 | 1.840070  | 1.088504  |
| 14.O | -2.614005 | 1.453024  | 3.074799  |
| 15.O | -1.562714 | -2.745606 | 1.145767  |
| 16.W | -0.220669 | -3.590492 | -0.002035 |
| 17.O | -0.083286 | -1.352650 | -0.850388 |
| 18.W | 1.584616  | -2.004737 | -2.384644 |
| 19.O | 1.760147  | -0.109132 | -2.700271 |
| 20.W | 1.822726  | 1.792689  | -2.380088 |

|      |           |           |           |
|------|-----------|-----------|-----------|
| 21.O | 0.084194  | 1.352814  | -0.850474 |
| 22.W | -1.585369 | 2.005562  | -2.383617 |
| 23.O | 0.131205  | 2.102776  | -3.305398 |
| 24.O | -2.971245 | -1.483631 | -0.812130 |
| 25.W | -1.822994 | -1.792069 | -2.377084 |
| 26.O | -1.760765 | 0.109683  | -2.698586 |
| 27.O | 4.424074  | 2.542888  | 1.305502  |
| 28.O | 3.951480  | -0.242950 | 1.062073  |
| 29.W | 2.831520  | -1.840637 | 1.086866  |
| 30.O | 2.612926  | -1.453372 | 3.073839  |
| 31.O | 4.083483  | -3.055207 | 1.313241  |
| 32.O | 1.219914  | -2.921805 | 1.139467  |
| 33.O | 2.767764  | -1.840571 | -0.820960 |
| 34.O | 1.565573  | 2.745427  | 1.145301  |
| 35.W | 0.222367  | 3.589665  | -0.001573 |
| 36.O | -1.079276 | 3.679262  | -1.433461 |
| 37.O | 2.972119  | 1.484887  | -0.815392 |
| 38.O | -4.083073 | 3.053849  | 1.314219  |
| 39.O | -1.218232 | 2.920198  | 1.140033  |
| 40.O | -2.768422 | 1.839804  | -0.819518 |
| 41.O | -0.324844 | -5.267712 | 0.499474  |
| 42.O | -1.525032 | -3.518078 | -1.430746 |
| 43.O | 1.078270  | -3.679597 | -1.435592 |
| 44.O | 0.324973  | 5.266736  | 0.500974  |
| 45.O | 1.524168  | 3.518794  | -1.432009 |
| 46.O | -2.972029 | -2.313015 | -3.593110 |
| 47.O | -0.133131 | -2.102108 | -3.305573 |
| 48.O | 2.657952  | -2.661753 | -3.603556 |
| 49.O | 2.969386  | 2.312365  | -3.598534 |
| 50.O | -2.659961 | 2.661444  | -3.602096 |
| 51.O | 1.599038  | -0.097914 | 5.023561  |
| 52.C | -4.369333 | 0.326849  | 4.834342  |
| 53.H | -4.265429 | 1.230089  | 5.456744  |
| 54.C | 4.354747  | -0.329016 | 4.844796  |
| 55.H | 4.246417  | -1.236470 | 5.460301  |
| 56.C | -4.640394 | -0.872144 | 5.745394  |
| 57.H | -3.819060 | -1.021731 | 6.456862  |
| 58.H | -5.569339 | -0.707270 | 6.308417  |
| 59.H | -4.755409 | -1.792313 | 5.154122  |
| 60.C | 4.619181  | 0.863851  | 5.765743  |
| 61.H | 3.795461  | 1.005964  | 6.476009  |
| 62.H | 5.546588  | 0.696488  | 6.330606  |
| 63.H | 4.734287  | 1.788880  | 5.182126  |
| 64.N | -5.505341 | 0.542661  | 3.922212  |
| 65.H | -5.305472 | 1.334867  | 3.305356  |
| 66.H | -5.593574 | -0.266816 | 3.299818  |
| 67.N | 5.497454  | -0.538241 | 3.939410  |
| 68.H | 5.304192  | -1.328128 | 3.317524  |
| 69.H | 5.588098  | 0.274244  | 3.321270  |

cRR\_1e-RED:

| Atom | X         | Y         | Z         |
|------|-----------|-----------|-----------|
| 1.P  | -2.731814 | -0.261803 | 4.021071  |
| 2.O  | -1.657268 | -0.161623 | 5.063521  |
| 3.O  | -2.581768 | -1.534940 | 3.082518  |
| 4.W  | -2.785744 | -1.922088 | 1.096967  |
| 5.O  | -1.388495 | -0.126114 | 0.980507  |
| 6.Si | 0.000095  | 0.000082  | 0.130416  |
| 7.O  | 1.388657  | 0.126170  | 0.980510  |
| 8.W  | 2.785532  | 1.921552  | 1.096977  |
| 9.O  | 2.578790  | 1.536099  | 3.082889  |
| 10.P | 2.728908  | 0.262038  | 4.019415  |
| 11.O | -3.998281 | -3.177443 | 1.306033  |
| 12.O | -3.943553 | -0.354290 | 1.072181  |
| 13.W | -3.076623 | 1.393317  | 1.112185  |
| 14.O | -2.822812 | 1.032297  | 3.100169  |
| 15.O | -1.139817 | -2.953636 | 1.151242  |
| 16.W | 0.320604  | -3.579253 | 0.013141  |
| 17.O | 0.121515  | -1.349578 | -0.836295 |
| 18.W | 1.874033  | -1.741002 | -2.364481 |
| 19.O | 1.758004  | 0.158067  | -2.687005 |
| 20.W | 1.527076  | 2.048084  | -2.372574 |
| 21.O | -0.120944 | 1.349947  | -0.836139 |
| 22.W | -1.873574 | 1.741165  | -2.364063 |
| 23.O | -0.193311 | 2.097167  | -3.292769 |
| 24.O | -2.714769 | -1.916156 | -0.811967 |
| 25.W | -1.526730 | -2.048306 | -2.372109 |
| 26.O | -1.757402 | -0.158093 | -2.685996 |
| 27.O | 3.998761  | 3.176546  | 1.305565  |
| 28.O | 3.943747  | 0.354052  | 1.073039  |
| 29.W | 3.076747  | -1.393882 | 1.111918  |
| 30.O | 2.822645  | -1.032424 | 3.099803  |
| 31.O | 4.487013  | -2.422146 | 1.320350  |
| 32.O | 1.638376  | -2.696922 | 1.160662  |
| 33.O | 3.011549  | -1.400581 | -0.799187 |
| 34.O | 1.140278  | 2.954064  | 1.150799  |
| 35.W | -0.319950 | 3.579425  | 0.013288  |
| 36.O | -1.622910 | 3.473824  | -1.416111 |
| 37.O | 2.714659  | 1.916101  | -0.811708 |
| 38.O | -4.487690 | 2.420452  | 1.320672  |
| 39.O | -1.638140 | 2.697461  | 1.160751  |
| 40.O | -3.011659 | 1.401280  | -0.799026 |
| 41.O | 0.469436  | -5.253080 | 0.516115  |
| 42.O | -0.973909 | -3.707357 | -1.423047 |
| 43.O | 1.622508  | -3.473770 | -1.416788 |
| 44.O | -0.469458 | 5.253526  | 0.515477  |
| 45.O | 0.973713  | 3.707821  | -1.423674 |
| 46.O | -2.580158 | -2.734147 | -3.593027 |

|      |           |           |           |
|------|-----------|-----------|-----------|
| 47.O | 0.193550  | -2.097069 | -3.292716 |
| 48.O | 3.037943  | -2.229675 | -3.580024 |
| 49.O | 2.579500  | 2.733849  | -3.594201 |
| 50.O | -3.036685 | 2.228977  | -3.580524 |
| 51.O | 1.652867  | 0.161426  | 5.060261  |
| 52.C | -4.369223 | -0.443389 | 4.874748  |
| 53.H | -4.282434 | -1.419268 | 5.379724  |
| 54.C | 4.365089  | 0.445109  | 4.874488  |
| 55.H | 4.272632  | 1.416644  | 5.386994  |
| 56.C | -5.586690 | -0.464733 | 3.956081  |
| 57.H | -5.500370 | -1.252107 | 3.198272  |
| 58.H | -6.492932 | -0.646035 | 4.551119  |
| 59.H | -5.700069 | 0.496668  | 3.435032  |
| 60.C | 5.581871  | 0.480731  | 3.955360  |
| 61.H | 5.490374  | 1.273723  | 3.204030  |
| 62.H | 6.487494  | 0.662563  | 4.551166  |
| 63.H | 5.700738  | -0.475780 | 3.426728  |
| 64.N | -4.536545 | 0.582646  | 5.924024  |
| 65.H | -3.675274 | 0.640613  | 6.475561  |
| 66.H | -4.643781 | 1.500528  | 5.480425  |
| 67.N | 4.539458  | -0.588304 | 5.915157  |
| 68.H | 3.678234  | -0.658627 | 6.465267  |
| 69.H | 4.655895  | -1.501339 | 5.464101  |

aRR\_2e-RED:

| Atom | X         | Y         | Z         |
|------|-----------|-----------|-----------|
| 1.P  | -0.084553 | 2.855819  | 3.982931  |
| 2.O  | -0.070640 | 2.066339  | 5.265683  |
| 3.O  | -1.372134 | 2.548761  | 3.107972  |
| 4.W  | -1.758123 | 2.859855  | 1.105318  |
| 5.O  | -0.043171 | 1.393656  | 0.945335  |
| 6.Si | 0.000192  | 0.000008  | 0.100572  |
| 7.O  | 0.043249  | -1.393826 | 0.945014  |
| 8.W  | 1.757494  | -2.860062 | 1.105042  |
| 9.O  | 1.371930  | -2.548705 | 3.107521  |
| 10.P | 0.084357  | -2.855991 | 3.982502  |
| 11.O | -2.915290 | 4.164422  | 1.367927  |
| 12.O | -0.119233 | 3.929756  | 1.128949  |
| 13.W | 1.581396  | 2.963848  | 1.106329  |
| 14.O | 1.216764  | 2.625283  | 3.107811  |
| 15.O | -2.882395 | 1.284693  | 1.168191  |
| 16.W | -3.621670 | -0.111751 | -0.008786 |
| 17.O | -1.360261 | -0.041728 | -0.856781 |
| 18.W | -1.843745 | -1.767788 | -2.373670 |
| 19.O | 0.054504  | -1.759944 | -2.702127 |
| 20.W | 1.949821  | -1.651797 | -2.374762 |
| 21.O | 1.360815  | 0.041805  | -0.856445 |
| 22.W | 1.843911  | 1.768168  | -2.373423 |
| 23.O | 2.126217  | 0.065428  | -3.286928 |



|      |           |           |           |
|------|-----------|-----------|-----------|
| 24.O | -1.774491 | 2.826098  | -0.801264 |
| 25.W | -1.949592 | 1.651998  | -2.373749 |
| 26.O | -0.054408 | 1.760187  | -2.701335 |
| 27.O | 2.915567  | -4.164452 | 1.366225  |
| 28.O | 0.119187  | -3.930089 | 1.128493  |
| 29.W | -1.581213 | -2.964448 | 1.105359  |
| 30.O | -1.216973 | -2.626360 | 3.106862  |
| 31.O | -2.662422 | -4.334899 | 1.356947  |
| 32.O | -2.799330 | -1.460005 | 1.166542  |
| 33.O | -1.595982 | -2.927082 | -0.801472 |
| 34.O | 2.882871  | -1.285419 | 1.168236  |
| 35.W | 3.621170  | 0.111313  | -0.008568 |
| 36.O | 3.596017  | 1.424492  | -1.409138 |
| 37.O | 1.774675  | -2.824857 | -0.801189 |
| 38.O | 2.661091  | 4.335069  | 1.358770  |
| 39.O | 2.799661  | 1.458787  | 1.167974  |
| 40.O | 1.597042  | 2.926343  | -0.800378 |
| 41.O | -5.300042 | -0.163082 | 0.519315  |
| 42.O | -3.674963 | 1.201518  | -1.407726 |
| 43.O | -3.595020 | -1.424157 | -1.409451 |
| 44.O | 5.300073  | 0.162129  | 0.517869  |
| 45.O | 3.675785  | -1.201515 | -1.409003 |
| 46.O | -2.583637 | 2.747011  | -3.592368 |
| 47.O | -2.126619 | -0.065024 | -3.287298 |
| 48.O | -2.409399 | -2.900161 | -3.592016 |
| 49.O | 2.583525  | -2.746770 | -3.593520 |
| 50.O | 2.408786  | 2.901871  | -3.590820 |
| 51.O | 0.069307  | -2.064574 | 5.264021  |
| 52.C | -0.171440 | 4.676238  | 4.325228  |
| 53.H | -0.133435 | 5.170102  | 3.343566  |
| 54.C | 0.172694  | -4.675560 | 4.329236  |
| 55.H | 0.134881  | -5.172680 | 3.349264  |
| 56.C | 1.008631  | 5.145449  | 5.175168  |
| 57.H | 1.964344  | 4.901091  | 4.693899  |
| 58.H | 0.957401  | 6.234052  | 5.318326  |
| 59.H | 0.990370  | 4.664609  | 6.164167  |
| 60.C | -1.006167 | -5.143204 | 5.181914  |
| 61.H | -1.962839 | -4.902529 | 4.700652  |
| 62.H | -0.952707 | -6.231084 | 5.329493  |
| 63.H | -0.987810 | -4.658253 | 6.168900  |
| 64.N | -1.447789 | 5.055080  | 4.968410  |
| 65.H | -2.227221 | 4.731006  | 4.387934  |
| 66.H | -1.536200 | 4.545763  | 5.854057  |
| 67.N | 1.449963  | -5.050753 | 4.972663  |
| 68.H | 2.228064  | -4.732408 | 4.387318  |
| 69.H | 1.541735  | -4.534091 | 5.853759  |

bRR\_2e-RED:

| Atom | X | Y | Z |
|------|---|---|---|
|------|---|---|---|

|      |           |           |           |
|------|-----------|-----------|-----------|
| 1.P  | -2.709425 | 0.174157  | 4.018945  |
| 2.O  | -1.658354 | 0.105430  | 5.091210  |
| 3.O  | -2.751708 | -1.119237 | 3.101843  |
| 4.W  | -3.026451 | -1.487903 | 1.096551  |
| 5.O  | -1.392520 | 0.087349  | 0.952710  |
| 6.Si | 0.000156  | 0.000258  | 0.104907  |
| 7.O  | 1.392728  | -0.086884 | 0.952627  |
| 8.W  | 3.026660  | 1.488155  | 1.096322  |
| 9.O  | 2.751478  | 1.120949  | 3.101983  |
| 10.P | 2.707006  | -0.172770 | 4.018532  |
| 11.O | -4.425273 | -2.535285 | 1.329776  |
| 12.O | -3.935605 | 0.240475  | 1.085182  |
| 13.W | -2.817963 | 1.842843  | 1.088130  |
| 14.O | -2.574773 | 1.456642  | 3.095751  |
| 15.O | -1.547612 | -2.740340 | 1.168670  |
| 16.W | -0.223017 | -3.606210 | -0.007934 |
| 17.O | -0.083492 | -1.354583 | -0.858844 |
| 18.W | 1.588795  | -2.000657 | -2.384504 |
| 19.O | 1.758529  | -0.109563 | -2.710470 |
| 20.W | 1.825036  | 1.786673  | -2.380836 |
| 21.O | 0.084108  | 1.354837  | -0.859027 |
| 22.W | -1.588320 | 2.000802  | -2.384701 |
| 23.O | 0.132976  | 2.123314  | -3.294463 |
| 24.O | -2.975563 | -1.505238 | -0.808695 |
| 25.W | -1.824771 | -1.786820 | -2.379826 |
| 26.O | -1.757710 | 0.109522  | -2.709562 |
| 27.O | 4.426006  | 2.534722  | 1.329608  |
| 28.O | 3.935604  | -0.240493 | 1.085348  |
| 29.W | 2.818206  | -1.842915 | 1.088034  |
| 30.O | 2.570968  | -1.455262 | 3.095786  |
| 31.O | 4.086858  | -3.042980 | 1.343603  |
| 32.O | 1.203939  | -2.914107 | 1.162137  |
| 33.O | 2.770551  | -1.862624 | -0.814706 |
| 34.O | 1.548019  | 2.741293  | 1.168442  |
| 35.W | 0.223429  | 3.606098  | -0.007753 |
| 36.O | -1.085537 | 3.707209  | -1.410932 |
| 37.O | 2.975147  | 1.506981  | -0.808911 |
| 38.O | -4.088255 | 3.042026  | 1.341335  |
| 39.O | -1.203715 | 2.912980  | 1.161621  |
| 40.O | -2.770048 | 1.861832  | -0.814412 |
| 41.O | -0.325905 | -5.281482 | 0.523722  |
| 42.O | -1.534945 | -3.544941 | -1.407479 |
| 43.O | 1.084626  | -3.707849 | -1.411325 |
| 44.O | 0.325448  | 5.281525  | 0.523099  |
| 45.O | 1.533965  | 3.546070  | -1.408684 |
| 46.O | -2.973153 | -2.318822 | -3.598715 |
| 47.O | -0.133261 | -2.123353 | -3.294011 |
| 48.O | 2.660322  | -2.669182 | -3.605869 |
| 49.O | 2.972652  | 2.318878  | -3.600233 |
| 50.O | -2.660762 | 2.667655  | -3.606257 |

|      |           |           |          |
|------|-----------|-----------|----------|
| 51.O | 1.655298  | -0.102628 | 5.089982 |
| 52.C | -4.389884 | 0.329949  | 4.796610 |
| 53.H | -4.298660 | 1.226183  | 5.431188 |
| 54.C | 4.387149  | -0.331780 | 4.796210 |
| 55.H | 4.294025  | -1.227178 | 5.431775 |
| 56.C | -4.696349 | -0.874664 | 5.688453 |
| 57.H | -3.893060 | -1.040303 | 6.416982 |
| 58.H | -5.636904 | -0.708323 | 6.232254 |
| 59.H | -4.805329 | -1.787062 | 5.083932 |
| 60.C | 4.697912  | 0.873124  | 5.686193 |
| 61.H | 3.896114  | 1.042241  | 6.415602 |
| 62.H | 5.638759  | 0.704813  | 6.228868 |
| 63.H | 4.808957  | 1.784375  | 5.080320 |
| 64.N | -5.503763 | 0.563863  | 3.857641 |
| 65.H | -5.274472 | 1.359886  | 3.254866 |
| 66.H | -5.565705 | -0.235105 | 3.217748 |
| 67.N | 5.499487  | -0.569555 | 3.856460 |
| 68.H | 5.268160  | -1.366780 | 3.255982 |
| 69.H | 5.561193  | 0.227704  | 3.214444 |

cRR\_2e-RED:

| Atom | X         | Y         | Z         |
|------|-----------|-----------|-----------|
| 1.P  | -2.724336 | -0.256476 | 4.024834  |
| 2.O  | -1.688704 | -0.153783 | 5.112603  |
| 3.O  | -2.537793 | -1.535196 | 3.107958  |
| 4.W  | -2.771489 | -1.923573 | 1.100565  |
| 5.O  | -1.388763 | -0.124616 | 0.970437  |
| 6.Si | 0.000494  | 0.000238  | 0.121062  |
| 7.O  | 1.390970  | 0.125256  | 0.968428  |
| 8.W  | 2.772973  | 1.923095  | 1.098466  |
| 9.O  | 2.538250  | 1.535474  | 3.104602  |
| 10.P | 2.719175  | 0.255739  | 4.021365  |
| 11.O | -3.998078 | -3.169231 | 1.333235  |
| 12.O | -3.928143 | -0.353118 | 1.098429  |
| 13.W | -3.066565 | 1.398577  | 1.109639  |
| 14.O | -2.787695 | 1.044417  | 3.119720  |
| 15.O | -1.121610 | -2.942515 | 1.175924  |
| 16.W | 0.322668  | -3.592916 | 0.006022  |
| 17.O | 0.121455  | -1.351740 | -0.844305 |
| 18.W | 1.874447  | -1.735892 | -2.368815 |
| 19.O | 1.753283  | 0.157692  | -2.703746 |
| 20.W | 1.531775  | 2.043098  | -2.373950 |
| 21.O | -0.121073 | 1.352119  | -0.844422 |
| 22.W | -1.874808 | 1.736199  | -2.367276 |
| 23.O | -0.193921 | 2.120537  | -3.281945 |
| 24.O | -2.715367 | -1.931755 | -0.804240 |
| 25.W | -1.532456 | -2.043013 | -2.371873 |
| 26.O | -1.753866 | -0.157419 | -2.702053 |
| 27.O | 4.000268  | 3.169247  | 1.329924  |

|      |           |           |           |
|------|-----------|-----------|-----------|
| 28.O | 3.930391  | 0.352973  | 1.096360  |
| 29.W | 3.068839  | -1.398459 | 1.106880  |
| 30.O | 2.788945  | -1.045350 | 3.117494  |
| 31.O | 4.491986  | -2.414813 | 1.334615  |
| 32.O | 1.624094  | -2.691153 | 1.180856  |
| 33.O | 3.015028  | -1.416679 | -0.798712 |
| 34.O | 1.123794  | 2.942642  | 1.174223  |
| 35.W | -0.321103 | 3.593292  | 0.005939  |
| 36.O | -1.633765 | 3.500251  | -1.393790 |
| 37.O | 2.716547  | 1.932876  | -0.806584 |
| 38.O | -4.490778 | 2.413043  | 1.338680  |
| 39.O | -1.621955 | 2.691653  | 1.182098  |
| 40.O | -3.015280 | 1.417728  | -0.796567 |
| 41.O | 0.472944  | -5.264707 | 0.539327  |
| 42.O | -0.981936 | -3.734797 | -1.398063 |
| 43.O | 1.632812  | -3.499621 | -1.395507 |
| 44.O | -0.470585 | 5.265215  | 0.538997  |
| 45.O | 0.981784  | 3.734976  | -1.399631 |
| 46.O | -2.586864 | -2.742288 | -3.591448 |
| 47.O | 0.192265  | -2.120120 | -3.281524 |
| 48.O | 3.037759  | -2.239018 | -3.586142 |
| 49.O | 2.584179  | 2.742280  | -3.595119 |
| 50.O | -3.039347 | 2.238076  | -3.583928 |
| 51.O | 1.675140  | 0.154079  | 5.101033  |
| 52.C | -4.379752 | -0.441969 | 4.845628  |
| 53.H | -4.294983 | -1.406209 | 5.373542  |
| 54.C | 4.368159  | 0.440811  | 4.854195  |
| 55.H | 4.281310  | 1.408269  | 5.375801  |
| 56.C | -5.581453 | -0.495428 | 3.907992  |
| 57.H | -5.474361 | -1.300060 | 3.171198  |
| 58.H | -6.497632 | -0.668365 | 4.491058  |
| 59.H | -5.691150 | 0.451320  | 3.359881  |
| 60.C | 5.576528  | 0.485253  | 3.924856  |
| 61.H | 5.476392  | 1.285002  | 3.181851  |
| 62.H | 6.489140  | 0.659868  | 4.512963  |
| 63.H | 5.687409  | -0.465615 | 3.384121  |
| 64.N | -4.582021 | 0.604165  | 5.873052  |
| 65.H | -3.723191 | 0.691838  | 6.425298  |
| 66.H | -4.697035 | 1.507983  | 5.402717  |
| 67.N | 4.559703  | -0.599888 | 5.888768  |
| 68.H | 3.696431  | -0.681382 | 6.434988  |
| 69.H | 4.675870  | -1.506719 | 5.424677  |

$\gamma$ -[SiW<sub>12</sub>O<sub>40</sub>]<sup>4+</sup>:

| Atom | X         | Y         | Z (Angstrom) |
|------|-----------|-----------|--------------|
| 1.W  | 0.000000  | -1.526840 | 3.548077     |
| 2.W  | 0.000000  | 1.526840  | 3.548077     |
| 3.W  | -1.698250 | -3.000809 | 0.910494     |
| 4.W  | -1.698250 | 3.000809  | 0.910494     |
| 5.W  | 1.698250  | 3.000809  | 0.910494     |

|       |           |           |           |
|-------|-----------|-----------|-----------|
| 6.W   | 1.698250  | -3.000809 | 0.910494  |
| 7.W   | -3.588298 | 0.000000  | -0.172366 |
| 8.W   | 3.588298  | 0.000000  | -0.172366 |
| 9.W   | -1.906131 | -1.706344 | -2.559313 |
| 10.W  | -1.906131 | 1.706344  | -2.559313 |
| 11.W  | 1.906131  | 1.706344  | -2.559313 |
| 12.W  | 1.906131  | -1.706344 | -2.559313 |
| 13.Si | 0.000000  | 0.000000  | 0.002552  |
| 14.O  | 0.000000  | -1.357580 | 0.934935  |
| 15.O  | 0.000000  | 1.357580  | 0.934935  |
| 16.O  | -1.343125 | 0.000000  | -0.970977 |
| 17.O  | 1.343125  | 0.000000  | -0.970977 |
| 18.O  | -1.234979 | 0.000000  | 3.452601  |
| 19.O  | 1.234979  | 0.000000  | 3.452601  |
| 20.O  | -2.896101 | -1.446318 | 0.896461  |
| 21.O  | -2.896101 | 1.446318  | 0.896461  |
| 22.O  | 2.896101  | 1.446318  | 0.896461  |
| 23.O  | 2.896101  | -1.446318 | 0.896461  |
| 24.O  | -1.611077 | -2.859438 | -1.002394 |
| 25.O  | -1.611077 | 2.859438  | -1.002394 |
| 26.O  | 1.611077  | 2.859438  | -1.002394 |
| 27.O  | 1.611077  | -2.859438 | -1.002394 |
| 28.O  | 0.000000  | -1.762475 | -2.870518 |
| 29.O  | 0.000000  | 1.762475  | -2.870518 |
| 30.O  | -1.382254 | -2.650291 | 2.826809  |
| 31.O  | -1.382254 | 2.650291  | 2.826809  |
| 32.O  | 1.382254  | 2.650291  | 2.826809  |
| 33.O  | 1.382254  | -2.650291 | 2.826809  |
| 34.O  | 0.000000  | -3.962599 | 0.914087  |
| 35.O  | 0.000000  | 3.962599  | 0.914087  |
| 36.O  | -3.574203 | -1.280764 | -1.667225 |
| 37.O  | -3.574203 | 1.280764  | -1.667225 |
| 38.O  | 3.574203  | 1.280764  | -1.667225 |
| 39.O  | 3.574203  | -1.280764 | -1.667225 |
| 40.O  | -2.038419 | 0.000000  | -3.496516 |
| 41.O  | 2.038419  | 0.000000  | -3.496516 |
| 42.O  | 0.000000  | -1.953935 | 5.240551  |
| 43.O  | 0.000000  | 1.953935  | 5.240551  |
| 44.O  | -2.828924 | -4.322641 | 1.081562  |
| 45.O  | -2.828924 | 4.322641  | 1.081562  |
| 46.O  | 2.828924  | 4.322641  | 1.081562  |
| 47.O  | 2.828924  | -4.322641 | 1.081562  |
| 48.O  | -5.280921 | 0.000000  | 0.265495  |
| 49.O  | 5.280921  | 0.000000  | 0.265495  |
| 50.O  | -2.477633 | -2.825676 | -3.772933 |
| 51.O  | -2.477633 | 2.825676  | -3.772933 |
| 52.O  | 2.477633  | 2.825676  | -3.772933 |
| 53.O  | 2.477633  | -2.825676 | -3.772933 |
